# Supplementary material
Source: PubMed Central journal article supplement (PMC6511761)
Supplement: ajtr0011-2447-f5.pdf [file ajtr0011-2447-f5.pdf]

## TP73-AS1 accelerates EOC via repressing p21

**Table S1.** Primers sequences for qRT-PCR and sequences of siRNA

|                | Sequences                                                                     |
|----------------|-------------------------------------------------------------------------------|
| si-TP73-AS1-1# | 5'-GTGTAACACTACTAGCAAATT-3'                                                   |
| si-TP73-AS1-2# | 5'-TAAACAGTGAAAACCTTTTGT-3'                                                   |
| si-TP73-AS1-3# | 5'-CAATTAATTCATATGAAGTT-3'                                                    |
| p21            | Forward, 5'-TGTGATGAAAGACGGCACAC-3'<br>Reverse, 5'-CTTCCTTTGGGTATTGTTTGG-3'   |
| EZH2           | Forward, 5'-CCTCAGACTCCGTAATGTG-3'<br>Reverse, 5'-CCGGGATTGTCAGATAGG-3'       |
| TP73-AS1       | Forward, 5'-AGAAGGTGAGAGGAATGGCTACC-3'<br>Reverse, 5'-TGGACCCAGGCGAGAAGGAT-3' |
| GAPDH          | Forward, 5'-AGAAGGCTGGGGCTCATTTG-3'<br>Reverse, 5'-AGGGGCCATCCACAGTCTTC-3'    |
